# Supplementary material
Source: HighWire-hosted journal article supplement (http://www.cmaj.ca/highwire/filestream/58933/field_highwire_adjunct_files/0/ankle-boutis-1-at.pdf)
Supplement: ankle-boutis-1-at.pdf [file ankle-boutis-1-at.pdf]

**Appendix 1 (as supplied by the authors): Impact of the Low Risk Ankle Rule on ankle radiography, length of stay, patient and physician satisfaction by Site Type**

|                                                 | PHASE 1 (week 1-26)    |                   | PHASE 2 (week 27-52)   |                   | PHASE 3 (week 53-78)   |                   |                                                           |                                                           |
|-------------------------------------------------|------------------------|-------------------|------------------------|-------------------|------------------------|-------------------|-----------------------------------------------------------|-----------------------------------------------------------|
| OUTCOME                                         | Pediatric Intervention | Pediatric Control | Pediatric Intervention | Pediatric Control | Pediatric Intervention | Pediatric Control | Between Group Differences Phase 1 to Phase 2, % (95% CI)§ | Between Group Differences Phase 1 to Phase 3, % (95% CI)§ |
| Ankle X-rays, % imaged (n/N)                    | 97.7<br>(130/133)      | 87.1<br>(264/303) | 69.5<br>(79/82)        | 84.8<br>(173/204) | 70.2<br>(80/114)       | 84.3<br>(226/268) | -22.9<br>(-34.9, -11.1)                                   | -21.7<br>(-33.6, -9.8)                                    |
| Median Length of Stay, hours (IQR)              | 2.5<br>(1.7, 3.4)      | 3.1<br>(2.2, 4.5) | 2.3<br>(1.5, 3.4)      | 2.7<br>(2.0, 3.9) | 2.5<br>(1.9, 3.7)      | 2.8<br>(1.9, 3.7) | 0.2<br>(-0.7, 1.2)                                        | 0.3<br>(-0.6, 1.3)                                        |
| Patient Satisfaction,‡ % very/ satisfied (n/N)  | 79.5<br>(66/83)        | 81.5<br>(119/146) | 90.1<br>(64/71)        | 90.3<br>(65/72)   | 92.9<br>(78/84)        | 94.6<br>(123/130) | 2.9<br>(-32.2, 37.9)                                      | 4.9<br>(-24.5, 24.3)                                      |
| Physician Satisfaction,† % very/satisfied (n/N) | 96.7<br>(89/92)        | N/A               | 97.9<br>(46/47)        | N/A               | 100<br>(54/54)         | N/A               | 4.9†<br>(-6.7, 9.7)                                       | 1.5†<br>(-6.8, 16.4)                                      |
|                                                 | General Intervention   | General Control   | General Intervention   | General Control   | General Intervention   | General Control   | Between Group Differences Phase 1 to Phase 2, % (95% CI)§ | Between Group Differences Phase 1 to Phase 3, % (95% CI)§ |
| Ankle X-rays, % imaged (n/N)                    | 92.6<br>(138/149)      | 97.1<br>(67/69)   | 72.7<br>(64/88)        | 100<br>(41/41)    | 73.0<br>(81/111)       | 95.5<br>(21/22)   | -24.1<br>(-38.6, -9.5)                                    | -30.1<br>(-42.1, -18.0)                                   |
| Median Length of Stay, hours (IQR)              | 1.8<br>(1.3, 2.7)      | 2.4<br>(1.5, 3.5) | 1.8<br>(1.3, 2.6)      | 2.5<br>(1.7, 3.7) | 1.9<br>(1.3, 2.7)      | 2.3<br>(1.4, 4.0) | -0.2<br>(-1.3, 0.8)                                       | 0.7<br>(-0.5, 1.9)                                        |
| Patient Satisfaction,‡ % very/ satisfied (n/N)  | 92.3<br>(96/104)       | 89.1<br>(49/55)   | 87.7<br>(50/57)        | 92.9<br>(26/28)   | 89.7<br>(70/78)        | 88.9<br>(8/9)     | -14.6<br>(-29.1, 0.5)                                     | 1.9<br>(-15.1, 18.9)                                      |

|                                                                     |                                   |                              |                                   |                              |                                   |                              |                                                                              |                                                                              |
|---------------------------------------------------------------------|-----------------------------------|------------------------------|-----------------------------------|------------------------------|-----------------------------------|------------------------------|------------------------------------------------------------------------------|------------------------------------------------------------------------------|
| <b>Physician Satisfaction, †<br/>% very/satisfied<br/>(n/N)</b>     | 85.5<br>(71/83)                   | N/A                          | 94.4<br>(51/54)                   | N/A                          | 96.0<br>(48/50)                   | N/A                          | 1.6†<br>(-31.7, 0.9)                                                         | 9.1†<br>(-31.0, 12.9)                                                        |
|                                                                     | <b>Community<br/>Intervention</b> | <b>Community<br/>Control</b> | <b>Community<br/>Intervention</b> | <b>Community<br/>Control</b> | <b>Community<br/>Intervention</b> | <b>Community<br/>Control</b> | <b>Between Group<br/>Differences<br/>Phase 1 to Phase 3,<br/>% (95% CI)§</b> | <b>Between Group<br/>Differences<br/>Phase 1 to Phase 3,<br/>% (95% CI)§</b> |
| <b>Ankle<br/>X-rays,<br/>% imaged (n/N)</b>                         | 99.3<br>(144/145)                 | 95.5<br>(84/88)              | 76.9<br>(90/117)                  | 94.7<br>(36/38)              | 70.7<br>(82/116)                  | 100<br>(42/42)               | -21.9<br>(-35.4, -8.3)                                                       | -15.6<br>(-34.0, 0.8)                                                        |
| <b>Median Length of<br/>Stay, hours (IQR)</b>                       | 1.8<br>(1.1, 2.6)                 | 2.8<br>(1.7, 3.5)            | 2.0<br>(1.2, 2.8)                 | 1.7<br>(1.2, 2.3)            | 1.8<br>(1.2, 2.4)                 | 1.8<br>(1.0, 2.9)            | 1.2<br>(0.3, 2.0)                                                            | 0.4<br>(-0.6, 1.5)                                                           |
| <b>Patient<br/>Satisfaction, ‡<br/>% very/ satisfied<br/>(n/N)</b>  | 98.1<br>(103/105)                 | 87.5<br>(49/56)              | 82.0<br>(82/100)                  | 97.1<br>(33/34)              | 93.3<br>(84/90)                   | 92.9<br>(59/63)              | -18.9<br>(-38.4, 0.7)                                                        | -18.6<br>(-46.4, 0.8)                                                        |
| <b>Physician<br/>Satisfaction, †<br/>% very/satisfied<br/>(n/N)</b> | 93.3<br>(42/45)                   | N/A                          | 88.5<br>(23/26)                   | N/A                          | 100<br>(21/21)                    | N/A                          | -6.5†<br>(-20.7, 7.6)                                                        | 2.9†<br>(-61.2, 15.4)                                                        |

§Calculated using interrupted time series with control differences of differences regression model

‡ Patients asked how satisfied they were with care they received in the emergency department ranked as "very satisfied/satisfied/neutral/unsatisfied/very unsatisfied."

†Physicians asked how satisfied they were with care they provided in the emergency department ranked as "very satisfied/satisfied/neutral/unsatisfied/very unsatisfied."
